# Supplementary material for: Bioaerosol emissions associated with pit latrine emptying operations
Source: PubMed Central journal article supplement (PMC6234106; doi:10.1016/j.scitotenv.2018.08.147), 2019-01-15

**Supporting information to:**

**Bioaerosol Emissions Associated with Pit Latrine Emptying Operations**

Stewart Farling, Tate Rogers, Jacqueline S. Knee, Elizabeth Tilley, Joe Brown, Marc A. Deshusses

Contact for correspondence: [marc.deshusses@duke.edu](mailto:marc.deshusses@duke.edu)

**Table S1.** Listing of all the field samples taken (continued on following pages)

| Pit #        | Sample           | Sample Time | Sample Volume  | Agar Type* | qPCR Sample <sup>^</sup>                                                                          | Notes                      |
|--------------|------------------|-------------|----------------|------------|---------------------------------------------------------------------------------------------------|----------------------------|
| #            | -                | min         | m <sup>3</sup> | -          | -                                                                                                 |                            |
| 1            | Flat             | 166         | -              | NA         | Y                                                                                                 | 2 hours and 46 minutes out |
|              | Flat             | 163         | -              | MI         |                                                                                                   | 2 hours and 43 minutes out |
|              | Pit - Background | 5           | 0.5            | NA         |                                                                                                   | Sampled before emptying    |
|              | Pit - Background | 1           | 0.1            | NA         |                                                                                                   | Sampled before emptying    |
|              | Pit - Background | 5           | 0.5            | MI         | Y                                                                                                 | Sampled before emptying    |
|              | Downwind         | 10          | 1              | NA         | Y                                                                                                 |                            |
|              | Downwind         | 10          | 1              | MI         |                                                                                                   |                            |
|              | Vent             | 0.5         | 0.05           | NA         |                                                                                                   | Vacuum Truck Blower Vent   |
|              | Vent             | 1           | 0.1            | MI         |                                                                                                   | Vacuum Truck Blower Vent   |
|              | Vent             | 2           | 0.2            | NA         | Y                                                                                                 | Vacuum Truck Blower Vent   |
|              | Vent             | 2           | 0.5            | MI         |                                                                                                   | Vacuum Truck Blower Vent   |
|              | Pit              | 2           | 0.2            | NA         | Y                                                                                                 |                            |
| Fluidization | 1                | 0.1         | MI             | Y          | Sample in latrine adjacent to pit, latrines connected to same pit, aerosols visible in this stall |                            |

\*NA = Nutrient Agar  
 \*MI = MI Agar, selective for *E. coli* and Coliforms  
 ^ = Y indicates sample was extracted for qPCR analysis

| Pit #         | Sample        | Sample Time | Sample Volume  | Agar Type* | qPCR Sample^                                         | Notes                    |
|---------------|---------------|-------------|----------------|------------|------------------------------------------------------|--------------------------|
| #             | -             | min         | m <sup>3</sup> | -          | -                                                    |                          |
| 2             | Background    | 10          | 1              | MI         |                                                      |                          |
|               | Background    | 10          | 1              | NA         | Y                                                    |                          |
|               | Flat          | 10          | 1              | NA         |                                                      |                          |
|               | Flat          | 10          | 1              | MI         |                                                      |                          |
|               | Pit           | 1           | 0.1            | MI         |                                                      |                          |
|               | Pit           | 10          | 1              | MI         | Y                                                    |                          |
|               | Vent          | 5           | 0.5            | MI         |                                                      |                          |
|               | Vent          | 10          | 1              | MI         | Y                                                    |                          |
|               | Downwind      | 10          | 1              | MI         | Y                                                    |                          |
|               | Flat          | 193         | -              | MI         |                                                      | Downwind Location        |
|               | Pit           | 1           | 0.1            | NA         |                                                      |                          |
|               | Pit           | 2           | 0.2            | NA         | Y                                                    |                          |
|               | Pit           | 5           | 0.5            | NA         | Y                                                    |                          |
|               | Vent          | 0.5         | 0.05           | NA         |                                                      | Vacuum Truck Blower Vent |
|               | Vent          | 2           | 0.2            | NA         | Y                                                    | Vacuum Truck Blower Vent |
|               | Vent          | 5           | 0.5            | NA         | Y                                                    | Vacuum Truck Blower Vent |
|               | Downwind      | 10          | 1              | NA         | Y                                                    |                          |
|               | Flat          | 193         | -              | NA         | Y                                                    | Downwind Location        |
|               | Flat          | 193         | -              | NA         | Y                                                    | Upwind Shower Location   |
|               | Plated-Sludge | -           | -              | NA         | Y                                                    |                          |
| Plated-Sludge | -             | -           | MI             | Y          | 1 mL sludge sample diluted into 100 mL sterile water |                          |

| Pit #  | Sample         | Sample Time | Sample Volume  | Agar Type* | qPCR Sample^                                         | Notes                                                                                                                                  |
|--------|----------------|-------------|----------------|------------|------------------------------------------------------|----------------------------------------------------------------------------------------------------------------------------------------|
| #      | -              | min         | m <sup>3</sup> | -          | -                                                    |                                                                                                                                        |
| 3      | Background     | 10          | 1              | NA         | Y                                                    |                                                                                                                                        |
|        | Background     | 10          | 1              | MI         |                                                      |                                                                                                                                        |
|        | Pit            | 10          | 1              | MI         |                                                      | Pit emptying was halted 2 minutes after 10 minute sample was started, but allowed to finish                                            |
|        | Pit            | 5           | 0.5            | NA         | Y                                                    |                                                                                                                                        |
| 4      | Background     | 10          | 1              | MI         |                                                      | Samples taken after PIT 3 was emptied nearby                                                                                           |
|        | Background     | 10          | 1              | NA         | Y                                                    | Samples taken after PIT 3 was emptied nearby                                                                                           |
|        | Pit            | 10          | 1              | MI         |                                                      |                                                                                                                                        |
|        | Pit            | 5           | 0.5            | NA         | Y                                                    |                                                                                                                                        |
|        | Pit-Post Clean | 10          | 1              | MI         |                                                      | Pit was emptied before full sampling could complete. Unplanned "post cleaning" samples added after workers completed cleaning the area |
|        | Pit-Post Clean | 5           | 0.5            | NA         |                                                      |                                                                                                                                        |
|        | Pit-Post Clean | 10          | 1              | NA         | Y                                                    |                                                                                                                                        |
| 5      | Background     | 10          | 1              | MI         |                                                      |                                                                                                                                        |
|        | Background     | 10          | 1              | NA         | Y                                                    |                                                                                                                                        |
|        | Pit            | 10          | 1              | MI         |                                                      |                                                                                                                                        |
|        | Flat           | 79          | -              | MI         |                                                      | Pit location                                                                                                                           |
|        | Pit-Post Clean | 10          | 1              | MI         |                                                      |                                                                                                                                        |
|        | Pit            | 1           | 0.1            | NA         | Y                                                    |                                                                                                                                        |
|        | Pit            | 2           | 0.2            | NA         |                                                      |                                                                                                                                        |
|        | Pit            | 5           | 0.5            | NA         | Y                                                    |                                                                                                                                        |
|        | Pit            | 10          | 1              | NA         | Y                                                    |                                                                                                                                        |
|        | Flat           | 79          |                | NA         | Y                                                    | Pit location                                                                                                                           |
|        | Flat           | 79          |                | NA         | Y                                                    | Window Seal                                                                                                                            |
|        | Flat           | 79          |                | NA         | Y                                                    | Clothes Line Location                                                                                                                  |
|        | Pit-Post Clean | 10          | 1              | NA         |                                                      |                                                                                                                                        |
| Sludge |                |             |                | Y          | 1 mL sludge sample diluted into 100 mL sterile water |                                                                                                                                        |

| Pit #          | Sample         | Sample Time | Sample Volume  | Agar Type* | qPCR Sample^ | Notes                                                                |
|----------------|----------------|-------------|----------------|------------|--------------|----------------------------------------------------------------------|
| #              | -              | min         | m <sup>3</sup> | -          | -            |                                                                      |
| 6              | Background     | 10          | 1              | MI         |              |                                                                      |
|                | Background     | 10          | 1              | NA         | Y            |                                                                      |
|                | Flat           | 50          |                | MI         |              | Pit location                                                         |
|                | Flat           | 50          |                | MI         |              | Window Seal                                                          |
|                | Vent           | 10          | 1              | MI         |              | Vacuum Truck Blower Vent                                             |
|                | Pit-Post Clean | 10          | 1              | MI         |              |                                                                      |
|                | Pit            | 5           | 0.5            | NA         | Y            |                                                                      |
|                | Flat           | 50          |                | NA         | Y            | Pit location                                                         |
|                | Vent           | 5           | 0.5            | NA         | Y            | Vacuum Truck Blower Vent                                             |
|                | Pit-Post Clean | 5           | 0.5            | NA         | Y            |                                                                      |
|                | Sludge         |             |                |            | Y            | 1 mL sludge sample diluted into 100 mL sterile water                 |
| 7              | Background     | 10          | 1              | NA         | Y            |                                                                      |
|                | Background     | 10          | 1              | MI         |              |                                                                      |
|                | Pit            | 5           | 0.5            | NA         | Y            | Sampler battery was dying, prioritized NA samples for qPCR           |
|                | Vent           | 5           | 0.5            | NA         | Y            | Sampler battery was dying, prioritized NA samples for qPCR           |
|                | Pit-Cleaning   | 10          | 0.5            | NA         | Y            | Sampler battery was dying, prioritized NA samples for qPCR           |
|                | Flat           | 148         | -              | NA         | Y            | Pit location                                                         |
|                | Flat           | 148         | -              | NA         | Y            | Pit location                                                         |
|                | Sludge         |             |                |            | Y            | 1 mL sludge sample diluted into 100 mL sterile water                 |
| Sterile Blanks | Lab Control    | 10          | 1              | NA         | Y            | 10 minute bioaerosol sample of lab space used to prepare agar plates |
|                | Blank          |             |                | MI         |              | Agar prep sterilization blanks - Batch 1                             |
|                | Blank          |             |                | NA         |              | Agar prep sterilization blanks - Batch 1                             |
|                | Blank          |             |                | MI         |              | Agar prep sterilization blanks - Batch 2                             |
|                | Blank          |             |                | NA         |              | Agar prep sterilization blanks - Batch 2                             |
|                | Blank          |             |                | MI         |              | Agar prep sterilization blanks - Batch 3                             |
|                | Blank          |             |                | NA         |              | Agar prep sterilization blanks - Batch 3                             |

\*NA = Nutrient Agar  
\*MI = MI Agar, selective for *E. coli* and Coliforms  
^ = Y indicates sample was extracted for qPCR analysis

# Pit 7 Sampling Layout

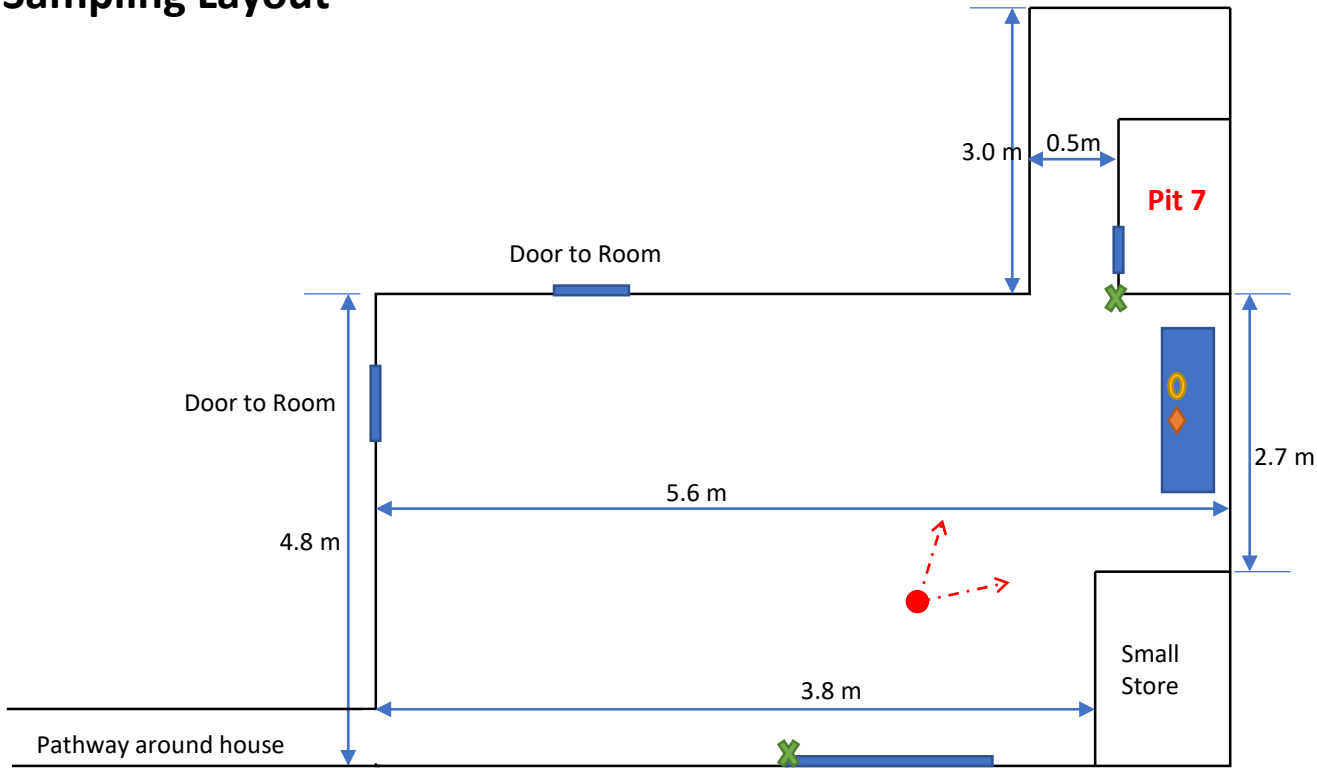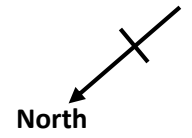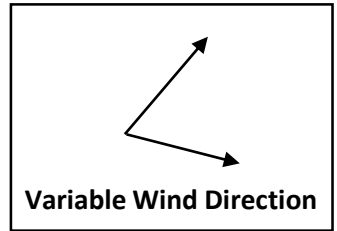

**LEGEND**

- PM 2.5 Counter
- Bioaerosol Sampler
- Passive Plate Location
- Generator
- Picture Camera View
- Sampled Pit

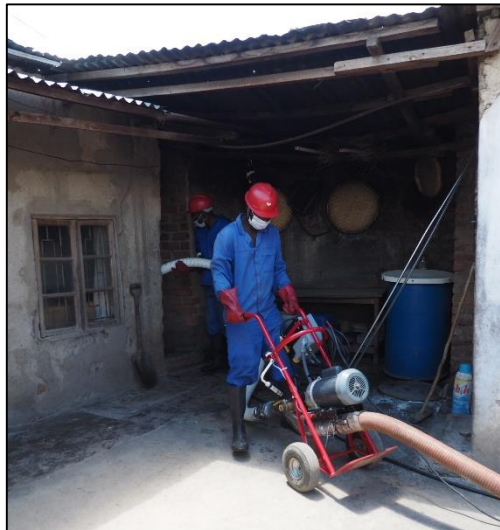

Vacuum Truck

**NOTES:**

- 1) Layout is NOT TO SCALE
- 2) Recorded dimensions are provided directly on plan
- 3) Additional labels may be provided for sample IDs

# Pit 6 Sampling Layout

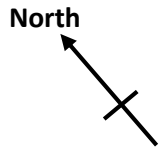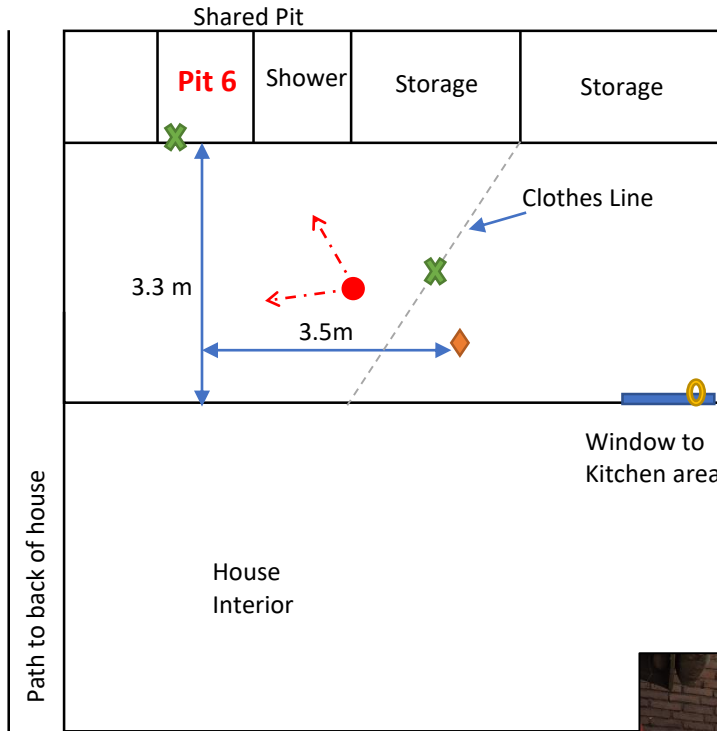

No significant wind in house courtyard due to walls

**Variable Wind Direction**

**LEGEND**

- PM 2.5 Counter
- Bioaerosol Sampler
- Passive Plate Location
- Generator
- Picture Camera View
- Sampled Pit

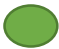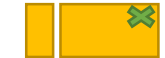

Vacuum Truck

Road Front

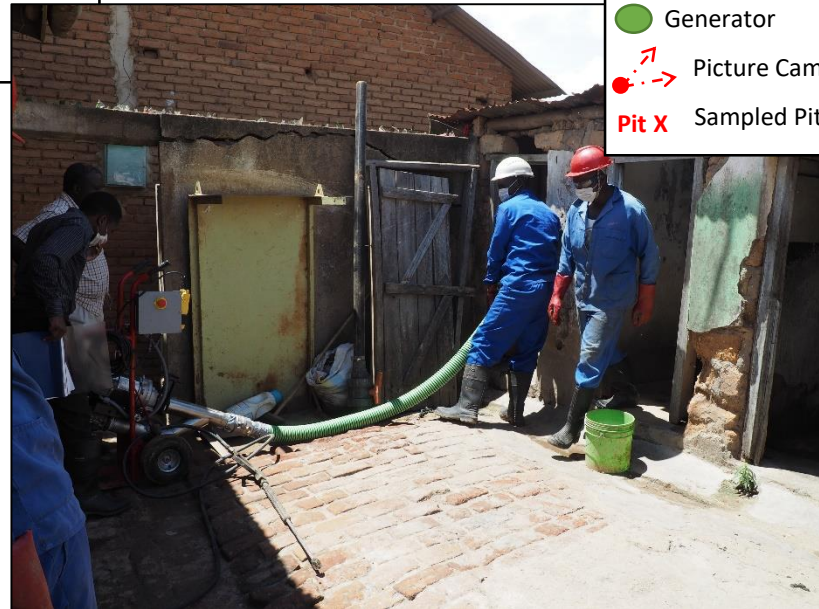

## NOTES:

- 1) Layout is NOT TO SCALE
- 2) Recorded dimensions are provided directly on plan
- 3) Additional labels may be provided for sample IDs

# Pit 5 Sampling Layout

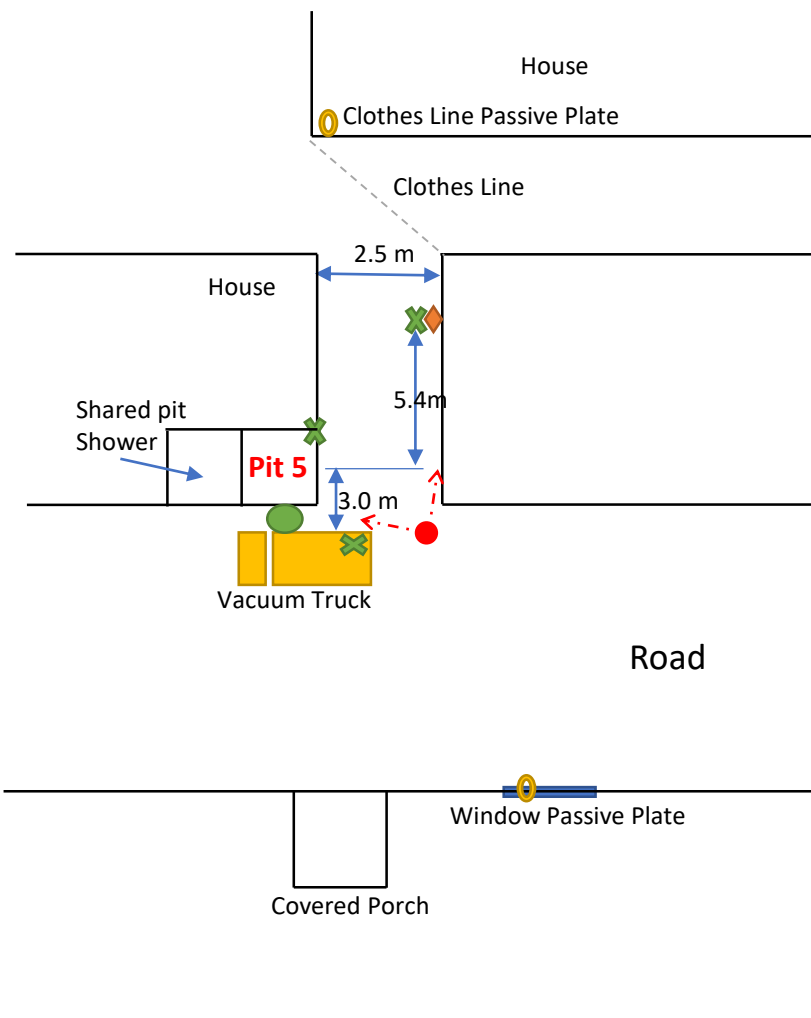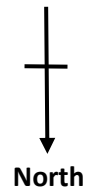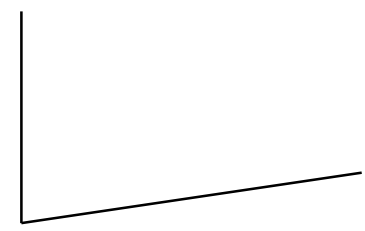

**Variable Wind Direction**

## LEGEND

-  PM 2.5 Counter
-  Bioaerosol Sampler
-  Passive Plate Location
-  Generator
-  Picture Camera View
-  Sampled Pit

## NOTES:

- 1) Layout is NOT TO SCALE
- 2) Recorded dimensions are provided directly on plan
- 3) Additional labels may be provided for sample IDs

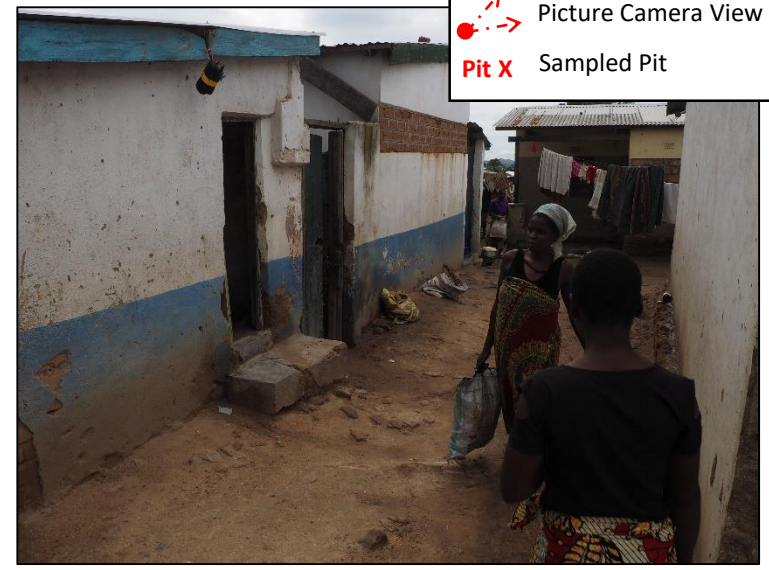

Pit 3

# Pit 4 Sampling Layout

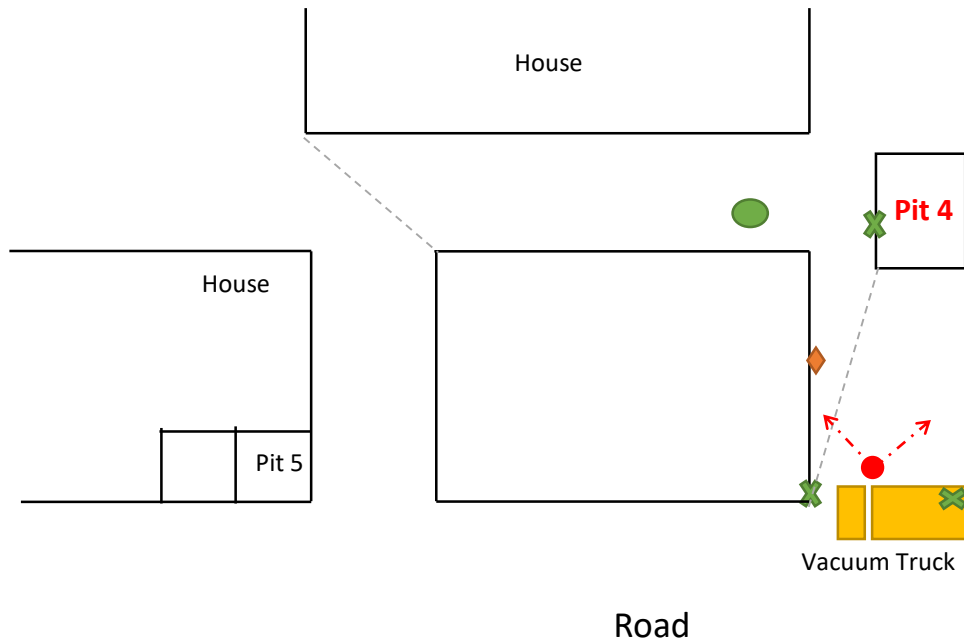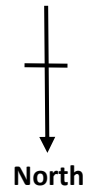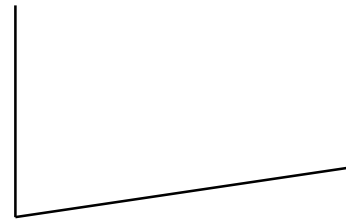

**Variable Wind Direction**

**LEGEND**

- PM 2.5 Counter
- Bioaerosol Sampler
- Passive Plate Location
- Generator
- Picture Camera View
- Pit X** Sampled Pit

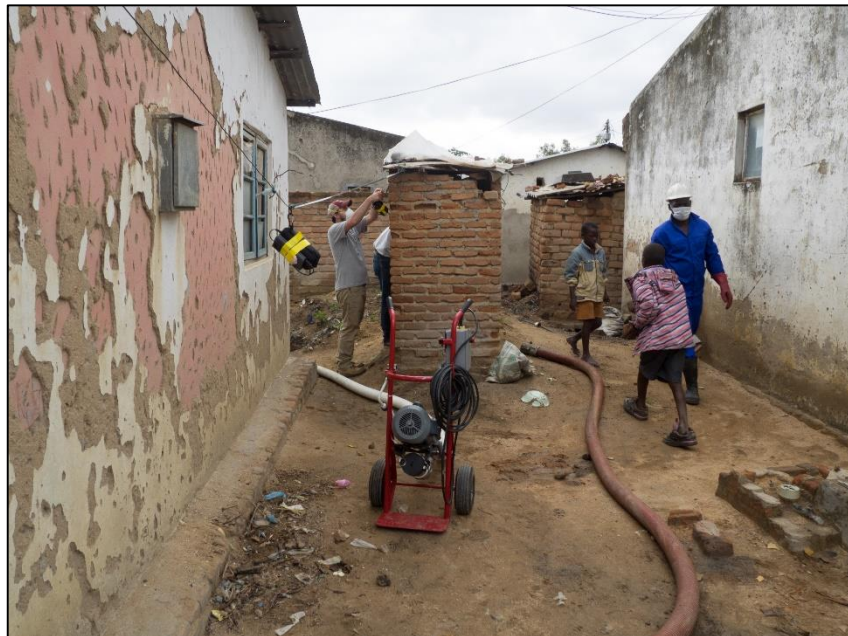

Pit 3

**NOTES:**

- 1) Layout is NOT TO SCALE
- 2) Recorded dimensions are provided directly on plan
- 3) Additional labels may be provided for sample IDs
- 4) Pit 3 and 4 were sampled the same day



# Pit 3 Sampling Layout

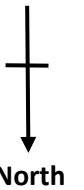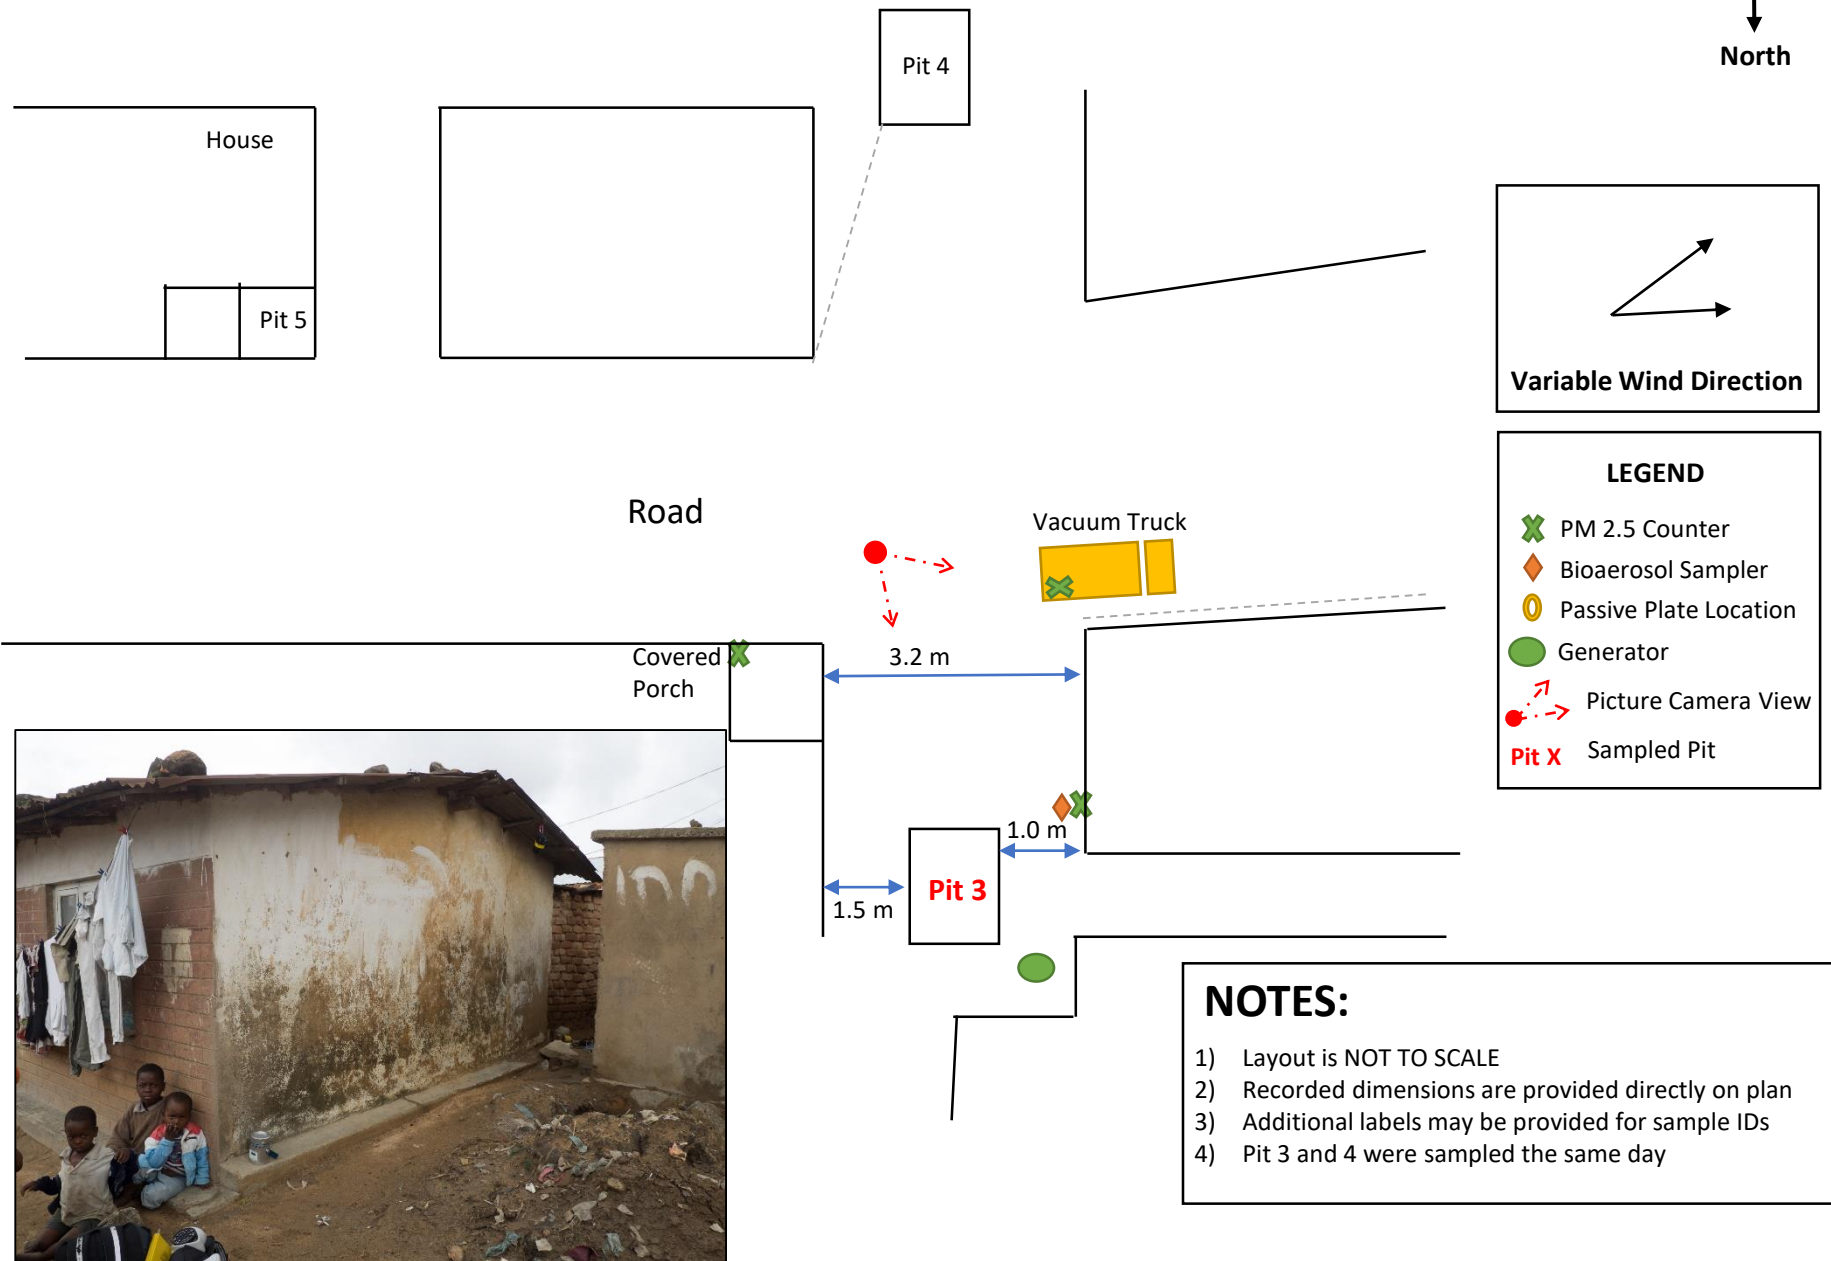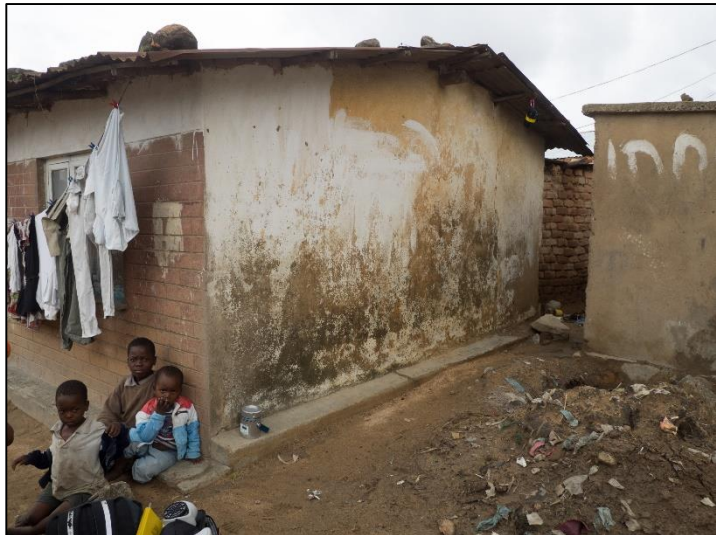

# Pit 2 Sampling Layout

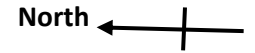

Road

Vacuum Truck (on other side of wall)

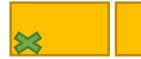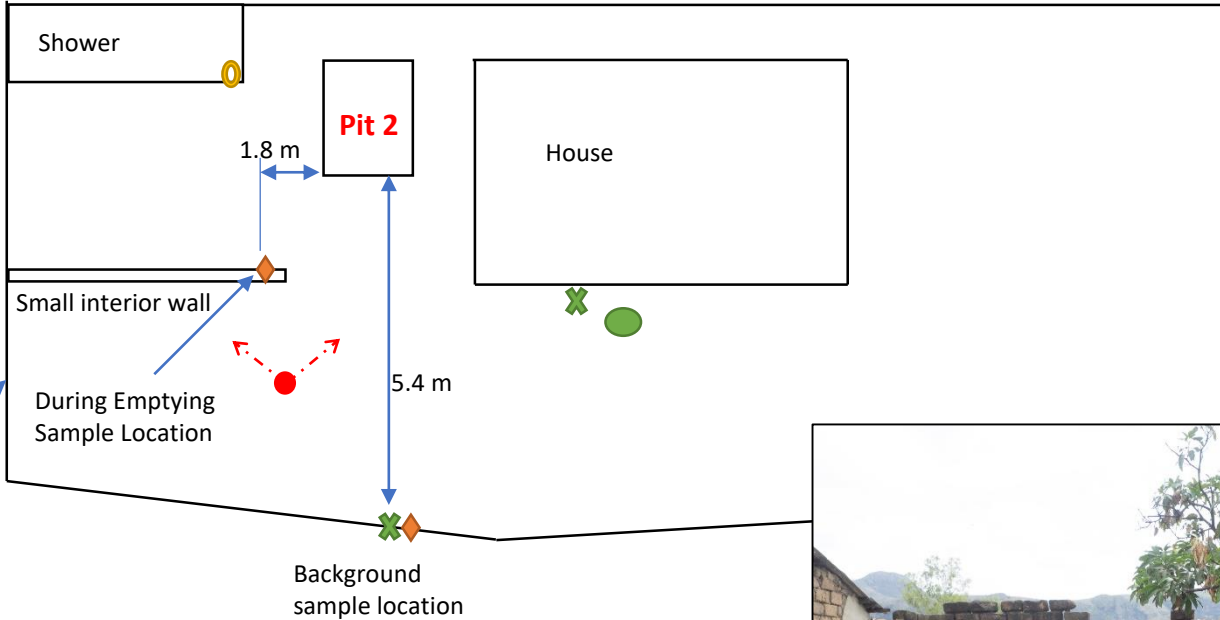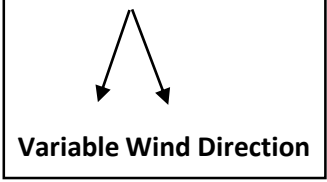

**LEGEND**

- PM 2.5 Counter
- Bioaerosol Sampler
- Passive Plate Location
- Generator
- Picture Camera View
- Pit X Sampled Pit

- NOTES:**
- 1) Layout is NOT TO SCALE
  - 2) Recorded dimensions are provided directly on plan
  - 3) Additional labels may be provided for sample IDs

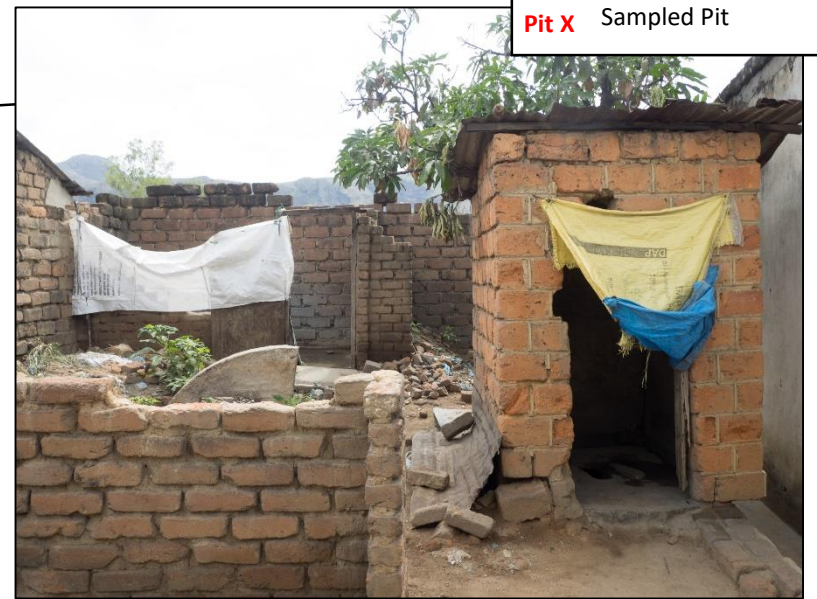

# Pit 1 Sampling Layout

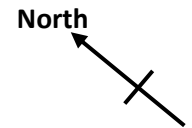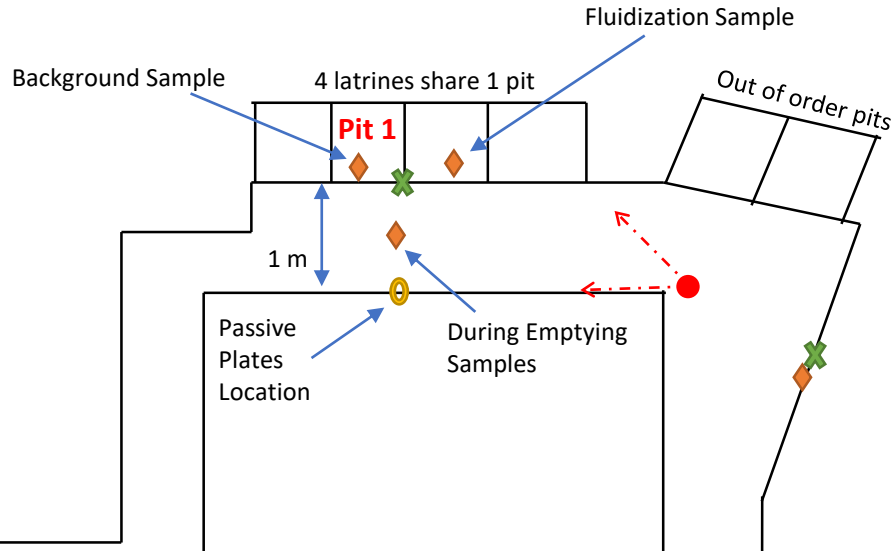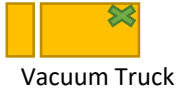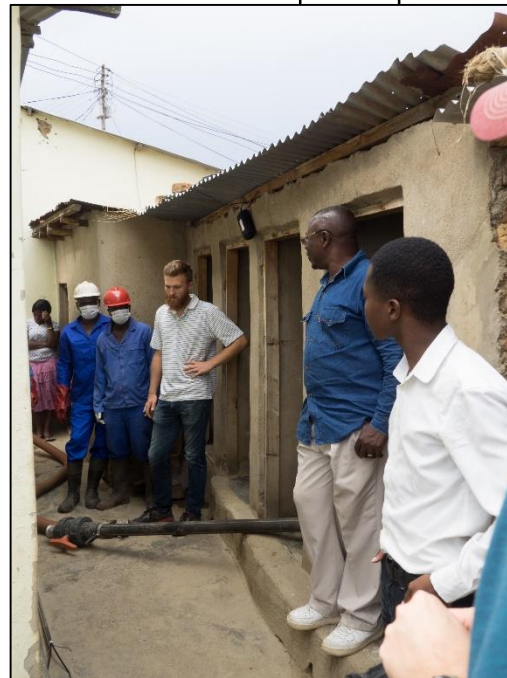

No significant wind due to walls

**Variable Wind Direction**

**LEGEND**

- PM 2.5 Counter
- Bioaerosol Sampler
- Passive Plate Location
- Generator
- Picture Camera View
- Pit X

**NOTES:**

- 1) Layout is NOT TO SCALE
- 2) Recorded dimensions are provided directly on plan
- 3) Additional labels may be provided for sample IDs

- Pit 7 other angles

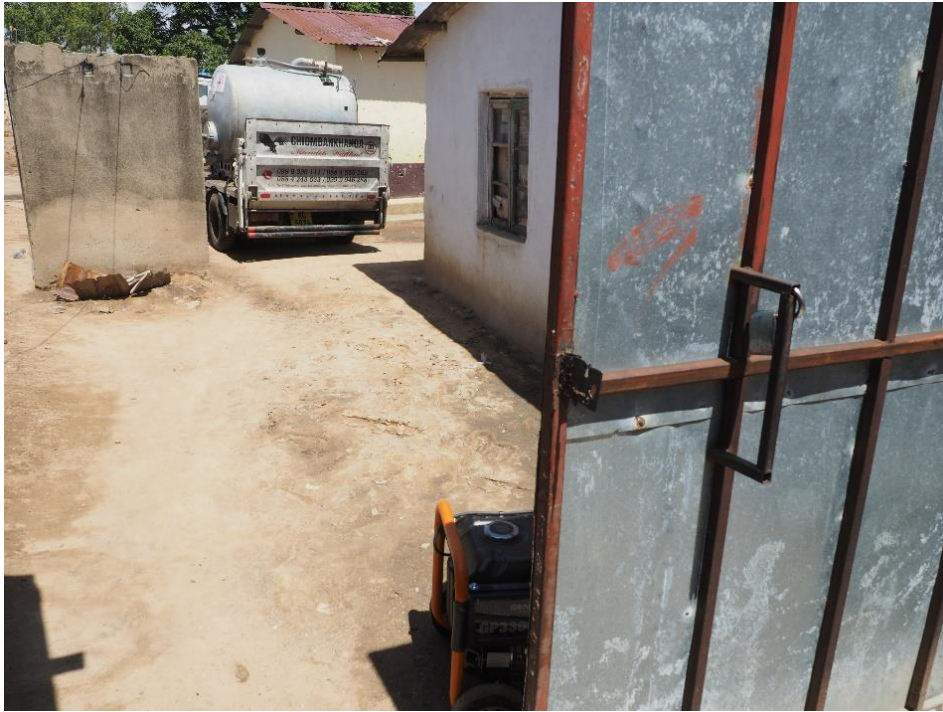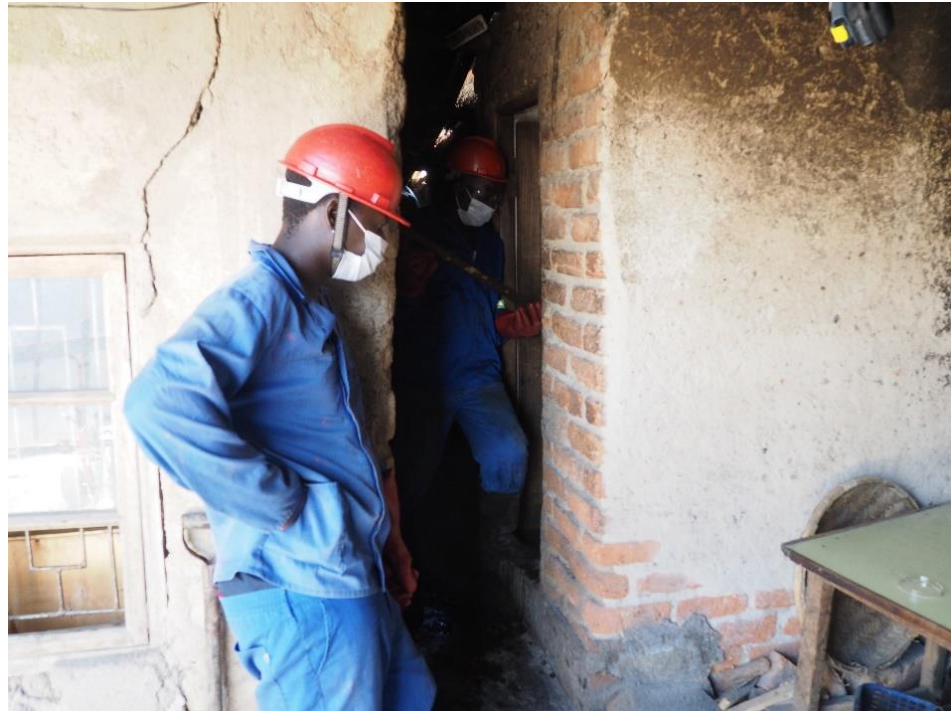

Supplement: mmc1.pdf [file mmc1.pdf]
